# Supplementary material for: Genome-wide analysis of lectin receptor-like kinases family from potato (Solanum tuberosum L.)
Source: PeerJ. 2020 Jun 10;8:e9310. doi: 10.7717/peerj.9310 (PMC7293193; doi:10.7717/peerj.9310)
Supplement: Supplemental Information 2 [file peerj-08-9310-s002.xlsx]

## Sheet: Sheet1
Supplementary Table 1 qRT-PCR primer sequences for actin and the selected potato genes.
Transcript ID	Protein ID	Forward (5ˊ-3ˊ)	Reverse(5ˊ-3ˊ)	Gene ID
PGSC0003DMT400010165	PGSC0003DMP400007093	TAGTGGAATTGTGCAAGTAGAGGAG	GTTCAGTACCCTGTCAATACACCAG	G-I-1
PGSC0003DMT400010211	PGSC0003DMP400007130	GCTTTTGGTGTATGAGTACATGACC	CTGAGGCTTAATATCACAATGGATG	G-I-2
PGSC0003DMT400044673	PGSC0003DMP400030282	CCTATTCCATCAAGACATTTCACTG	AGGAATGCCGACTAGATTTTCATAC	G-I-3
PGSC0003DMT400047489	PGSC0003DMP400032146	TCGACTCTATTCTCACGAATTCAAC	GACCCTGGTAGACACATACAAGATG	G-I-4
PGSC0003DMT400062337	PGSC0003DMP400041968	AGGAGGACATGTACATTTAGGCTTC	GGGAATTTGAGGATGTATAGTTTGG	G-I-5
PGSC0003DMT400073253	PGSC0003DMP400049549	CTGACGAAGACGTATAATTCCAATG	GATGCTCAAAGAGATAGGAAAGGAC	G-I-6
PGSC0003DMT400081462	PGSC0003DMP400055136	ATAGGCCAACCATAGTCATTCTCTC	GATCTTAGTCGATTGGGTTCTTCAT	G-I-7
PGSC0003DMT400002736	PGSC0003DMP400001977	CGACACAGCCAGATATAAGAATTTG	TAACTGGATAACTGACTCGTGCTTC	G-II-1
PGSC0003DMT400012612	PGSC0003DMP400008766	ACAAGATTCAGCTAGCTTCTCATCA	TCTCGGTCACGTAAGCACTCTATAC	G-III-1
PGSC0003DMT400067264	PGSC0003DMP400045383	TGCCCAGAGACATCTAGTGTTAATC	TACTCAGCTACTGGATCTTGGAATG	G-III-2
PGSC0003DMT400095372	PGSC0003DMP400067047	AATGAAGGGAATGCCATAGAACTAC	AACATTTCATTCTCCTCCAGTAAGG	G-III-3
PGSC0003DMT400068513	PGSC0003DMP400046287	GCTTTTCAAGATCTAAAGGATCAGC	AGTTCCAAAGCCAATTATACCTCTG	L-3
PGSC0003DMT400077519	PGSC0003DMP400052506	GCAATTATTATCTGGATGAGCACAC	GGAAACCTATTGATCCTAAAGCAGA	L-4
		TGAAGGAGATAACATGATTGAGAGG	TCTTGTAAACATCCTGAAGTGGAAG	Actin
